# Supplementary material for: TNBC-Specific UGDH-AS1+ NK Cells Encode NSKM, Promoting Cancer Progression by Inhibiting NK Cells Activity
Source: Research Square preprint supplement (doi:10.21203/rs.3.rs-4723989/v1), 2024-07-21
Supplement: Supplementary file 1 [file 3237173ea8ebf724a1b5cc4f.docx]

Table S3 Top 10 marker genes of the TNBC scRNA-seq data

| gene | p_val | avg_log2FC | pct.1 | pct.2 | p_val_adj | cluster |
| --- | --- | --- | --- | --- | --- | --- |
| RPS19 | 1.38E-46 | 1.203997 | 0.8 | 0.39 | 4.14E-43 | T_B |
| CTNNB1 | 6.06E-39 | 1.037613 | 0.733 | 0.343 | 1.82E-35 | T_B |
| SRSF3 | 4.75E-36 | 1.069473 | 0.842 | 0.461 | 1.43E-32 | T_B |
| NFIB | 1.53E-33 | 1.199483 | 0.765 | 0.379 | 4.58E-30 | T_B |
| TSPYL1 | 2.19E-33 | 0.994454 | 0.797 | 0.409 | 6.58E-30 | T_B |
| HMGN2 | 1.58E-26 | 1.053423 | 0.772 | 0.447 | 4.74E-23 | T_B |
| SRSF6 | 2.41E-26 | 0.989113 | 0.802 | 0.462 | 7.22E-23 | T_B |
| H3F3B | 4.15E-20 | 1.237203 | 0.866 | 0.607 | 1.24E-16 | T_B |
| B2M | 1.90E-19 | 1.008472 | 0.787 | 0.477 | 5.70E-16 | T_B |
| RPL7 | 1.18E-18 | 1.220236 | 0.829 | 0.55 | 3.54E-15 | T_B |
| AZGP1 | 1.64E-111 | 3.407213 | 0.952 | 0.217 | 4.92E-108 | Epithelials_1 |
| CLDN4 | 5.74E-106 | 3.228282 | 0.946 | 0.216 | 1.72E-102 | Epithelials_1 |
| KRT19 | 6.39E-106 | 3.088988 | 0.952 | 0.236 | 1.92E-102 | Epithelials_1 |
| KRT18 | 4.46E-105 | 3.474028 | 0.962 | 0.223 | 1.34E-101 | Epithelials_1 |
| KRT8 | 1.37E-103 | 3.499514 | 0.984 | 0.262 | 4.12E-100 | Epithelials_1 |
| TPD52 | 1.22E-102 | 2.971579 | 0.936 | 0.208 | 3.65E-99 | Epithelials_1 |
| EFNA1 | 5.84E-98 | 2.94088 | 0.942 | 0.242 | 1.75E-94 | Epithelials_1 |
| TACSTD2 | 1.56E-95 | 2.935923 | 0.968 | 0.328 | 4.67E-92 | Epithelials_1 |
| KIAA1324 | 6.64E-95 | 3.110153 | 0.929 | 0.204 | 1.99E-91 | Epithelials_1 |
| FTO | 2.05E-88 | 3.068378 | 0.862 | 0.188 | 6.14E-85 | Epithelials_1 |
| SLAMF7 | 6.77E-108 | 3.23476 | 1 | 0.083 | 2.03E-104 | NK |
| UGGT1 | 1.99E-107 | 5.185803 | 0.977 | 0.068 | 5.96E-104 | NK |
| FOXK1 | 2.92E-104 | 4.795609 | 0.962 | 0.086 | 8.76E-101 | NK |
| SHISA9 | 4.72E-103 | 3.926673 | 0.887 | 0.045 | 1.42E-99 | NK |
| PNPT1 | 1.96E-98 | 4.4445 | 0.948 | 0.116 | 5.89E-95 | NK |
| MBOAT1 | 4.34E-96 | 6.721854 | 0.958 | 0.16 | 1.30E-92 | NK |
| IFIT3 | 4.77E-94 | 3.395598 | 0.995 | 0.114 | 1.43E-90 | NK |
| LYZ | 5.05E-93 | 4.482717 | 0.944 | 0.113 | 1.52E-89 | NK |
| UGDH-AS1 | 9.59E-81 | 3.109753 | 0.85 | 0.107 | 2.88E-77 | NK |
| KCNQ1OT1 | 2.98E-79 | 3.682627 | 0.869 | 0.109 | 8.93E-76 | NK |
| EGR1 | 6.21E-55 | 2.319073 | 0.892 | 0.386 | 1.86E-51 | Fibroblasts |
| VIM | 8.96E-54 | 2.717985 | 0.871 | 0.292 | 2.69E-50 | Fibroblasts |
| SPARC | 3.32E-51 | 2.896021 | 0.844 | 0.235 | 9.97E-48 | Fibroblasts |
| CALD1 | 8.81E-50 | 2.228853 | 0.855 | 0.344 | 2.64E-46 | Fibroblasts |
| SERPING1 | 1.26E-48 | 2.492125 | 0.839 | 0.285 | 3.77E-45 | Fibroblasts |
| C1S | 1.00E-41 | 3.007092 | 0.785 | 0.236 | 3.00E-38 | Fibroblasts |
| AXL | 4.51E-39 | 3.20833 | 0.78 | 0.24 | 1.35E-35 | Fibroblasts |
| SPARCL1 | 2.09E-37 | 2.216018 | 0.796 | 0.314 | 6.28E-34 | Fibroblasts |
| C1R | 1.06E-26 | 2.496572 | 0.71 | 0.257 | 3.18E-23 | Fibroblasts |
| CRISPLD2 | 4.25E-15 | 2.30186 | 0.597 | 0.297 | 1.27E-11 | Fibroblasts |
| CALR | 1.97E-38 | 2.298775 | 1 | 0.319 | 5.90E-35 | Macrophages |
| PTPRC | 5.14E-36 | 2.337405 | 0.971 | 0.299 | 1.54E-32 | Macrophages |
| IFI6 | 6.68E-36 | 2.4734 | 0.985 | 0.363 | 2.00E-32 | Macrophages |
| HLA-DRA | 2.98E-35 | 2.346086 | 0.971 | 0.301 | 8.94E-32 | Macrophages |
| HLA-DRB1 | 1.35E-34 | 2.223508 | 0.971 | 0.338 | 4.05E-31 | Macrophages |
| PLAUR | 9.32E-33 | 2.162757 | 0.985 | 0.316 | 2.79E-29 | Macrophages |
| CTSS | 1.41E-32 | 2.57187 | 0.897 | 0.292 | 4.22E-29 | Macrophages |
| LYZ | 3.14E-32 | 2.921127 | 1 | 0.216 | 9.41E-29 | Macrophages |
| CD68 | 8.11E-32 | 2.455507 | 0.956 | 0.281 | 2.43E-28 | Macrophages |
| ARPC1B | 1.48E-29 | 2.162919 | 0.926 | 0.418 | 4.45E-26 | Macrophages |
| NCOA7 | 8.39E-15 | 2.453015 | 0.962 | 0.319 | 2.52E-11 | Epithelials_2 |
| PRSS8 | 2.21E-12 | 2.457438 | 0.885 | 0.402 | 6.62E-09 | Epithelials_2 |
| ITPR2 | 5.14E-12 | 2.344547 | 0.885 | 0.424 | 1.54E-08 | Epithelials_2 |
| SPINT1 | 6.30E-11 | 2.365722 | 0.885 | 0.391 | 1.89E-07 | Epithelials_2 |
| ITGA6 | 1.94E-10 | 2.470342 | 0.846 | 0.371 | 5.83E-07 | Epithelials_2 |
| KRT15 | 7.61E-10 | 2.477622 | 0.846 | 0.374 | 2.28E-06 | Epithelials_2 |
| CLDN3 | 1.05E-09 | 2.324134 | 0.846 | 0.402 | 3.16E-06 | Epithelials_2 |
| POLD2 | 2.45E-09 | 2.319324 | 0.846 | 0.36 | 7.34E-06 | Epithelials_2 |
| HIBADH | 1.33E-08 | 2.294282 | 0.808 | 0.396 | 3.99E-05 | Epithelials_2 |
| KCNN4 | 1.38E-08 | 2.526166 | 0.808 | 0.337 | 4.14E-05 | Epithelials_2 |
