# Supplementary material for: TNBC-Specific UGDH-AS1+ NK Cells Encode NSKM, Promoting Cancer Progression by Inhibiting NK Cells Activity
Source: Research Square preprint supplement (doi:10.21203/rs.3.rs-4723989/v1), 2024-07-21
Supplement: Supplementary file 2 [file 51b866ac254e57f37542189f.docx]

Table S5 Top 50 marker genes of the NK cell clusters

| gene | p_val | avg_log2FC | pct.1 | pct.2 | p_val_adj | cluster |
| --- | --- | --- | --- | --- | --- | --- |
| GZMH | 1.97E-103 | 2.707127 | 0.847 | 0.15 | 5.05E-99 | GZMH_NK |
| FGFBP2 | 5.84E-101 | 2.706287 | 0.739 | 0.074 | 1.50E-96 | GZMH_NK |
| NKG7 | 3.91E-88 | 1.792285 | 1 | 0.595 | 1.00E-83 | GZMH_NK |
| FCGR3A | 1.98E-87 | 2.496885 | 0.732 | 0.118 | 5.08E-83 | GZMH_NK |
| PRF1 | 1.65E-77 | 2.008308 | 0.908 | 0.358 | 4.23E-73 | GZMH_NK |
| CST7 | 4.01E-75 | 1.891455 | 0.969 | 0.512 | 1.03E-70 | GZMH_NK |
| CCL4 | 2.37E-74 | 2.584812 | 0.854 | 0.255 | 6.08E-70 | GZMH_NK |
| SPON2 | 2.92E-69 | 2.504916 | 0.559 | 0.067 | 7.49E-65 | GZMH_NK |
| S100A4 | 3.75E-63 | 1.669507 | 0.927 | 0.506 | 9.63E-59 | GZMH_NK |
| GNG2 | 5.22E-61 | 2.017761 | 0.755 | 0.251 | 1.34E-56 | GZMH_NK |
| TMSB10 | 1.78E-59 | 1.231874 | 1 | 0.727 | 4.57E-55 | GZMH_NK |
| GZMA | 5.61E-55 | 1.381007 | 0.92 | 0.369 | 1.44E-50 | GZMH_NK |
| PFN1 | 1.90E-54 | 1.243025 | 0.989 | 0.709 | 4.88E-50 | GZMH_NK |
| S1PR5 | 5.84E-52 | 1.817934 | 0.41 | 0.036 | 1.50E-47 | GZMH_NK |
| CYBA | 2.16E-50 | 1.417502 | 0.92 | 0.587 | 5.53E-46 | GZMH_NK |
| GZMB | 3.19E-47 | 1.102983 | 0.889 | 0.424 | 8.19E-43 | GZMH_NK |
| CCL4L2 | 1.60E-45 | 2.406002 | 0.502 | 0.1 | 4.12E-41 | GZMH_NK |
| MYL12A | 8.88E-45 | 1.360351 | 0.893 | 0.576 | 2.28E-40 | GZMH_NK |
| KLRF1 | 2.36E-41 | 1.602067 | 0.598 | 0.18 | 6.05E-37 | GZMH_NK |
| ARPC2 | 1.12E-40 | 1.22878 | 0.904 | 0.564 | 2.87E-36 | GZMH_NK |
| S100A6 | 9.65E-40 | 1.416048 | 0.866 | 0.506 | 2.48E-35 | GZMH_NK |
| GZMM | 6.43E-38 | 1.50307 | 0.64 | 0.247 | 1.65E-33 | GZMH_NK |
| LAIR2 | 4.70E-37 | 1.64558 | 0.318 | 0.035 | 1.21E-32 | GZMH_NK |
| PRSS23 | 1.80E-36 | 1.693291 | 0.349 | 0.05 | 4.62E-32 | GZMH_NK |
| ITGB2 | 5.84E-35 | 1.328141 | 0.736 | 0.358 | 1.50E-30 | GZMH_NK |
| CD247 | 9.11E-35 | 1.286964 | 0.766 | 0.409 | 2.34E-30 | GZMH_NK |
| CD99 | 1.25E-32 | 1.173645 | 0.782 | 0.438 | 3.20E-28 | GZMH_NK |
| TRBC1 | 6.24E-32 | 1.489023 | 0.621 | 0.265 | 1.60E-27 | GZMH_NK |
| C12orf75 | 1.52E-31 | 1.474682 | 0.548 | 0.197 | 3.91E-27 | GZMH_NK |
| MYOM2 | 3.17E-31 | 1.813456 | 0.318 | 0.051 | 8.15E-27 | GZMH_NK |
| AES | 2.52E-28 | 1.353357 | 0.571 | 0.261 | 6.45E-24 | GZMH_NK |
| ADGRG1 | 8.19E-28 | 1.440666 | 0.31 | 0.058 | 2.10E-23 | GZMH_NK |
| EFHD2 | 2.06E-27 | 1.328389 | 0.559 | 0.239 | 5.28E-23 | GZMH_NK |
| S100A10 | 1.33E-25 | 1.255684 | 0.743 | 0.463 | 3.42E-21 | GZMH_NK |
| RORA | 2.53E-25 | 1.038011 | 0.452 | 0.151 | 6.50E-21 | GZMH_NK |
| ARL4C | 2.76E-25 | 1.36119 | 0.54 | 0.227 | 7.08E-21 | GZMH_NK |
| FCRL6 | 7.71E-25 | 1.170924 | 0.284 | 0.051 | 1.98E-20 | GZMH_NK |
| ZEB2 | 1.03E-21 | 1.168611 | 0.533 | 0.241 | 2.64E-17 | GZMH_NK |
| LGALS1 | 4.46E-21 | 1.017563 | 0.613 | 0.309 | 1.14E-16 | GZMH_NK |
| PLEK | 9.86E-21 | 1.171235 | 0.356 | 0.111 | 2.53E-16 | GZMH_NK |
| FLNA | 2.03E-20 | 1.121837 | 0.598 | 0.325 | 5.22E-16 | GZMH_NK |
| DBI | 3.56E-20 | 1.000112 | 0.613 | 0.338 | 9.13E-16 | GZMH_NK |
| CREM | 6.56E-20 | 1.017052 | 0.77 | 0.512 | 1.68E-15 | GZMH_NK |
| CD3E | 8.50E-20 | 1.306617 | 0.575 | 0.319 | 2.18E-15 | GZMH_NK |
| SELPLG | 1.12E-17 | 1.056702 | 0.441 | 0.193 | 2.88E-13 | GZMH_NK |
| CCL3 | 4.75E-17 | 1.53891 | 0.264 | 0.069 | 1.22E-12 | GZMH_NK |
| NFATC2 | 9.20E-17 | 1.249151 | 0.425 | 0.201 | 2.36E-12 | GZMH_NK |
| NCR3 | 9.84E-17 | 1.09112 | 0.372 | 0.146 | 2.52E-12 | GZMH_NK |
| DSTN | 4.14E-15 | 1.038721 | 0.46 | 0.23 | 1.06E-10 | GZMH_NK |
| LINC00861 | 1.79E-12 | 1.0943 | 0.272 | 0.103 | 4.59E-08 | GZMH_NK |
| HSPA1B | 3.23E-125 | 4.902948 | 0.875 | 0.096 | 8.30E-121 | DNAJB1_NK |
| HSPA1A | 1.41E-109 | 5.065944 | 0.886 | 0.157 | 3.61E-105 | DNAJB1_NK |
| DNAJB1 | 5.64E-90 | 4.571518 | 0.913 | 0.31 | 1.45E-85 | DNAJB1_NK |
| HSPH1 | 2.02E-89 | 4.000906 | 0.81 | 0.16 | 5.18E-85 | DNAJB1_NK |
| CACYBP | 1.25E-71 | 2.333585 | 0.728 | 0.135 | 3.21E-67 | DNAJB1_NK |
| HSPA6 | 5.72E-69 | 4.33519 | 0.424 | 0.014 | 1.47E-64 | DNAJB1_NK |
| HSP90AB1 | 1.00E-67 | 2.721621 | 0.94 | 0.561 | 2.57E-63 | DNAJB1_NK |
| HSP90AA1 | 6.82E-62 | 3.497107 | 0.913 | 0.638 | 1.75E-57 | DNAJB1_NK |
| HSPD1 | 2.65E-58 | 2.451923 | 0.81 | 0.291 | 6.81E-54 | DNAJB1_NK |
| HSPA8 | 4.08E-56 | 2.351746 | 0.908 | 0.615 | 1.05E-51 | DNAJB1_NK |
| ZFAND2A | 3.88E-53 | 2.423267 | 0.484 | 0.059 | 9.96E-49 | DNAJB1_NK |
| DNAJA1 | 1.59E-51 | 2.271784 | 0.837 | 0.436 | 4.09E-47 | DNAJB1_NK |
| AHSA1 | 1.11E-50 | 1.633591 | 0.592 | 0.109 | 2.84E-46 | DNAJB1_NK |
| EGR1 | 1.23E-50 | 2.792697 | 0.609 | 0.138 | 3.16E-46 | DNAJB1_NK |
| HSPE1 | 1.42E-50 | 2.280851 | 0.842 | 0.441 | 3.64E-46 | DNAJB1_NK |
| CHORDC1 | 3.63E-46 | 1.597959 | 0.549 | 0.1 | 9.31E-42 | DNAJB1_NK |
| DNAJB4 | 3.21E-45 | 1.674541 | 0.391 | 0.039 | 8.23E-41 | DNAJB1_NK |
| DUSP1 | 1.86E-44 | 2.122792 | 0.902 | 0.509 | 4.77E-40 | DNAJB1_NK |
| PPP1R15A | 3.86E-43 | 1.943112 | 0.81 | 0.323 | 9.90E-39 | DNAJB1_NK |
| NR4A1 | 6.61E-40 | 2.280665 | 0.75 | 0.303 | 1.70E-35 | DNAJB1_NK |
| NEU1 | 6.93E-39 | 1.966204 | 0.516 | 0.114 | 1.78E-34 | DNAJB1_NK |
| UBB | 1.60E-38 | 1.661452 | 0.924 | 0.664 | 4.10E-34 | DNAJB1_NK |
| STIP1 | 2.21E-38 | 1.494223 | 0.44 | 0.073 | 5.67E-34 | DNAJB1_NK |
| KLF2 | 6.32E-37 | 2.177123 | 0.641 | 0.209 | 1.62E-32 | DNAJB1_NK |
| DEDD2 | 2.65E-36 | 1.313251 | 0.37 | 0.049 | 6.80E-32 | DNAJB1_NK |
| MRPL18 | 2.03E-35 | 1.561045 | 0.467 | 0.098 | 5.22E-31 | DNAJB1_NK |
| FOSB | 3.45E-35 | 1.883018 | 0.766 | 0.325 | 8.85E-31 | DNAJB1_NK |
| ATF3 | 1.02E-33 | 2.050673 | 0.413 | 0.074 | 2.61E-29 | DNAJB1_NK |
| FOS | 2.26E-33 | 1.752691 | 0.842 | 0.476 | 5.80E-29 | DNAJB1_NK |
| HSPA4 | 1.82E-30 | 1.237174 | 0.408 | 0.083 | 4.67E-26 | DNAJB1_NK |
| JUN | 7.10E-30 | 2.350019 | 0.777 | 0.409 | 1.82E-25 | DNAJB1_NK |
| MYADM | 3.24E-28 | 1.834383 | 0.712 | 0.346 | 8.31E-24 | DNAJB1_NK |
| TCP1 | 5.43E-27 | 1.288362 | 0.484 | 0.143 | 1.39E-22 | DNAJB1_NK |
| HSPA5 | 1.15E-26 | 1.440401 | 0.755 | 0.411 | 2.94E-22 | DNAJB1_NK |
| FKBP4 | 2.42E-26 | 1.338943 | 0.38 | 0.083 | 6.21E-22 | DNAJB1_NK |
| UBC | 3.99E-25 | 1.445594 | 0.902 | 0.703 | 1.02E-20 | DNAJB1_NK |
| KLF6 | 3.60E-24 | 1.442546 | 0.821 | 0.492 | 9.23E-20 | DNAJB1_NK |
| TUBA1A | 6.56E-23 | 1.762382 | 0.582 | 0.247 | 1.68E-18 | DNAJB1_NK |
| BTG2 | 6.73E-22 | 1.513554 | 0.707 | 0.363 | 1.73E-17 | DNAJB1_NK |
| RHOB | 9.97E-20 | 1.567798 | 0.473 | 0.173 | 2.56E-15 | DNAJB1_NK |
| LMNA | 3.91E-19 | 1.658289 | 0.652 | 0.336 | 1.00E-14 | DNAJB1_NK |
| ICAM1 | 4.45E-18 | 1.233028 | 0.424 | 0.14 | 1.14E-13 | DNAJB1_NK |
| PMAIP1 | 5.46E-17 | 1.24017 | 0.348 | 0.108 | 1.40E-12 | DNAJB1_NK |
| CD69 | 5.03E-15 | 1.337977 | 0.696 | 0.477 | 1.29E-10 | DNAJB1_NK |
| HSPB1 | 2.91E-14 | 1.352038 | 0.489 | 0.228 | 7.48E-10 | DNAJB1_NK |
| ANXA1 | 8.84E-14 | 1.813473 | 0.734 | 0.531 | 2.27E-09 | DNAJB1_NK |
| ANKRD37 | 5.26E-12 | 1.068888 | 0.332 | 0.124 | 1.35E-07 | DNAJB1_NK |
| SAT1 | 1.16E-10 | 1.095439 | 0.663 | 0.455 | 2.97E-06 | DNAJB1_NK |
| MXD1 | 3.15E-10 | 1.244329 | 0.272 | 0.096 | 8.09E-06 | DNAJB1_NK |
| MT1X | 0.007273836 | 1.710153 | 0.326 | 0.234 | 1 | DNAJB1_NK |
| LDLRAD4 | 6.17E-55 | 2.225588 | 0.732 | 0.207 | 1.58E-50 | ITGAE_NK |
| KRT86 | 1.56E-48 | 2.162127 | 0.615 | 0.144 | 4.01E-44 | ITGAE_NK |
| CD7 | 1.02E-40 | 1.539414 | 0.932 | 0.584 | 2.62E-36 | ITGAE_NK |
| ZNF683 | 6.60E-39 | 1.788799 | 0.585 | 0.158 | 1.69E-34 | ITGAE_NK |
| ZFP36L2 | 3.38E-38 | 1.402904 | 0.941 | 0.637 | 8.68E-34 | ITGAE_NK |
| GALNT2 | 6.27E-38 | 1.505925 | 0.385 | 0.057 | 1.61E-33 | ITGAE_NK |
| KLRC1 | 7.45E-37 | 1.745233 | 0.673 | 0.234 | 1.91E-32 | ITGAE_NK |
| CPNE7 | 4.54E-36 | 1.332933 | 0.302 | 0.028 | 1.16E-31 | ITGAE_NK |
| KRT81 | 6.05E-36 | 1.705396 | 0.522 | 0.129 | 1.55E-31 | ITGAE_NK |
| LGALS3 | 5.03E-34 | 1.035658 | 0.459 | 0.106 | 1.29E-29 | ITGAE_NK |
| BTG1 | 8.97E-34 | 1.052781 | 0.98 | 0.713 | 2.30E-29 | ITGAE_NK |
| COTL1 | 2.38E-33 | 1.517398 | 0.649 | 0.238 | 6.12E-29 | ITGAE_NK |
| ITGAE | 3.81E-33 | 1.55395 | 0.439 | 0.097 | 9.79E-29 | ITGAE_NK |
| CD74 | 8.49E-32 | 1.123742 | 0.888 | 0.564 | 2.18E-27 | ITGAE_NK |
| CTSA | 2.03E-31 | 1.478606 | 0.537 | 0.161 | 5.20E-27 | ITGAE_NK |
| TNFRSF18 | 6.01E-30 | 1.355646 | 0.624 | 0.233 | 1.54E-25 | ITGAE_NK |
| RGCC | 6.85E-30 | 1.200103 | 0.834 | 0.452 | 1.76E-25 | ITGAE_NK |
| KIR2DL4 | 9.01E-30 | 1.301094 | 0.454 | 0.111 | 2.31E-25 | ITGAE_NK |
| DUSP4 | 7.33E-29 | 1.488818 | 0.537 | 0.172 | 1.88E-24 | ITGAE_NK |
| ITGA1 | 9.94E-29 | 1.211815 | 0.322 | 0.05 | 2.55E-24 | ITGAE_NK |
| CAPG | 1.25E-26 | 1.367664 | 0.507 | 0.156 | 3.21E-22 | ITGAE_NK |
| CSF1 | 1.48E-26 | 1.867103 | 0.268 | 0.037 | 3.81E-22 | ITGAE_NK |
| IL2RB | 4.13E-26 | 1.16099 | 0.727 | 0.344 | 1.06E-21 | ITGAE_NK |
| HLA-DRA | 6.71E-26 | 1.493078 | 0.483 | 0.152 | 1.72E-21 | ITGAE_NK |
| PABPC1 | 6.76E-26 | 1.039952 | 0.888 | 0.584 | 1.74E-21 | ITGAE_NK |
| ALOX5AP | 5.29E-25 | 1.320742 | 0.644 | 0.288 | 1.36E-20 | ITGAE_NK |
| ITM2C | 3.66E-24 | 1.380497 | 0.483 | 0.161 | 9.39E-20 | ITGAE_NK |
| PDE4B | 2.56E-23 | 1.19141 | 0.629 | 0.269 | 6.57E-19 | ITGAE_NK |
| SLC7A5 | 6.70E-23 | 1.297632 | 0.6 | 0.252 | 1.72E-18 | ITGAE_NK |
| HLA-DRB5 | 1.32E-20 | 1.22776 | 0.341 | 0.09 | 3.38E-16 | ITGAE_NK |
| CKLF | 2.01E-20 | 1.192489 | 0.541 | 0.227 | 5.17E-16 | ITGAE_NK |
| GABARAPL1 | 2.89E-20 | 1.027423 | 0.58 | 0.248 | 7.41E-16 | ITGAE_NK |
| HLA-DRB1 | 5.76E-20 | 1.264905 | 0.624 | 0.317 | 1.48E-15 | ITGAE_NK |
| PTPN22 | 6.40E-20 | 1.039359 | 0.556 | 0.238 | 1.64E-15 | ITGAE_NK |
| GZMK | 9.23E-20 | 1.335777 | 0.454 | 0.163 | 2.37E-15 | ITGAE_NK |
| RGS1 | 2.22E-19 | 1.035947 | 0.6 | 0.269 | 5.69E-15 | ITGAE_NK |
| PIK3R1 | 3.30E-18 | 1.064565 | 0.644 | 0.338 | 8.46E-14 | ITGAE_NK |
| IRF4 | 5.26E-18 | 1.016321 | 0.283 | 0.068 | 1.35E-13 | ITGAE_NK |
| HLA-DPB1 | 6.05E-18 | 1.05826 | 0.615 | 0.313 | 1.55E-13 | ITGAE_NK |
| SLC16A3 | 1.06E-17 | 1.072174 | 0.532 | 0.236 | 2.73E-13 | ITGAE_NK |
| SAMSN1 | 9.96E-17 | 1.044756 | 0.629 | 0.336 | 2.56E-12 | ITGAE_NK |
| HLA-DPA1 | 1.01E-16 | 1.103088 | 0.585 | 0.301 | 2.58E-12 | ITGAE_NK |
| CARD19 | 1.19E-15 | 1.060531 | 0.288 | 0.084 | 3.06E-11 | ITGAE_NK |
| TBCD | 5.75E-15 | 1.018245 | 0.259 | 0.071 | 1.48E-10 | ITGAE_NK |
| TMIGD2 | 7.36E-15 | 1.199181 | 0.322 | 0.115 | 1.89E-10 | ITGAE_NK |
| AREG | 2.67E-13 | 1.073442 | 0.556 | 0.296 | 6.86E-09 | ITGAE_NK |
| HLA-DQB1 | 1.88E-12 | 1.1264 | 0.376 | 0.162 | 4.82E-08 | ITGAE_NK |
| SQSTM1 | 1.47E-07 | 1.034395 | 0.741 | 0.467 | 0.0037769 | ITGAE_NK |
| SERINC1 | 0.000437297 | 1.147907 | 0.332 | 0.214 | 1 | ITGAE_NK |
| XRCC5 | 0.002011606 | 2.400787 | 0.332 | 0.216 | 1 | ITGAE_NK |
| UGDH-AS1 | 9.19E-110 | 5.662249 | 0.702 | 0.037 | 2.36E-105 | UGDHAS1_NK |
| KCNQ1OT1 | 3.14E-105 | 5.184608 | 0.728 | 0.06 | 8.05E-101 | UGDHAS1_NK |
| FBLIM1 | 2.21E-102 | 3.593867 | 0.613 | 0.021 | 5.67E-98 | UGDHAS1_NK |
| ZBTB8A | 3.49E-93 | 3.1692 | 0.574 | 0.023 | 8.97E-89 | UGDHAS1_NK |
| SHISA9 | 5.43E-93 | 5.419187 | 0.583 | 0.024 | 1.39E-88 | UGDHAS1_NK |
| RBMS2 | 5.64E-91 | 3.62891 | 0.532 | 0.013 | 1.45E-86 | UGDHAS1_NK |
| LRTOMT | 8.30E-83 | 3.512772 | 0.532 | 0.025 | 2.13E-78 | UGDHAS1_NK |
| IRGQ | 3.70E-82 | 2.944695 | 0.566 | 0.039 | 9.49E-78 | UGDHAS1_NK |
| PNPO | 8.55E-79 | 3.151638 | 0.54 | 0.035 | 2.20E-74 | UGDHAS1_NK |
| ANKRD20A9P | 1.17E-78 | 4.400981 | 0.506 | 0.023 | 3.01E-74 | UGDHAS1_NK |
| ZNF793 | 2.44E-78 | 3.26757 | 0.515 | 0.028 | 6.27E-74 | UGDHAS1_NK |
| KIF18B | 7.77E-78 | 3.058549 | 0.464 | 0.012 | 1.99E-73 | UGDHAS1_NK |
| CCDC142 | 2.87E-77 | 3.070222 | 0.489 | 0.02 | 7.36E-73 | UGDHAS1_NK |
| LYZ | 1.64E-76 | 3.19654 | 0.506 | 0.027 | 4.20E-72 | UGDHAS1_NK |
| LINC00294 | 6.42E-76 | 3.76569 | 0.472 | 0.017 | 1.65E-71 | UGDHAS1_NK |
| ASTN2 | 1.78E-74 | 3.546226 | 0.519 | 0.032 | 4.58E-70 | UGDHAS1_NK |
| XPNPEP3 | 3.24E-74 | 3.118598 | 0.545 | 0.046 | 8.31E-70 | UGDHAS1_NK |
| FOXK1 | 3.28E-74 | 4.361553 | 0.528 | 0.039 | 8.43E-70 | UGDHAS1_NK |
| MAP1LC3C | 1.60E-73 | 2.907387 | 0.443 | 0.012 | 4.09E-69 | UGDHAS1_NK |
| C21orf62 | 7.51E-73 | 3.251506 | 0.447 | 0.015 | 1.93E-68 | UGDHAS1_NK |
| L2HGDH | 3.02E-71 | 4.18961 | 0.498 | 0.031 | 7.75E-67 | UGDHAS1_NK |
| ABCC9 | 1.70E-70 | 4.501896 | 0.468 | 0.023 | 4.36E-66 | UGDHAS1_NK |
| ZNF526 | 3.27E-70 | 3.800247 | 0.455 | 0.021 | 8.38E-66 | UGDHAS1_NK |
| FDPSP2 | 4.39E-70 | 2.875886 | 0.434 | 0.015 | 1.13E-65 | UGDHAS1_NK |
| ORC4 | 1.46E-68 | 4.081648 | 0.596 | 0.079 | 3.74E-64 | UGDHAS1_NK |
| BRIP1 | 3.68E-66 | 3.523703 | 0.434 | 0.02 | 9.44E-62 | UGDHAS1_NK |
| SPRED1 | 7.99E-66 | 2.997323 | 0.413 | 0.015 | 2.05E-61 | UGDHAS1_NK |
| METTL21A | 1.50E-64 | 4.875541 | 0.609 | 0.096 | 3.84E-60 | UGDHAS1_NK |
| TSIX | 2.00E-64 | 3.23147 | 0.434 | 0.023 | 5.14E-60 | UGDHAS1_NK |
| PDE6A | 1.20E-63 | 3.284539 | 0.404 | 0.015 | 3.08E-59 | UGDHAS1_NK |
| EMP2 | 2.21E-63 | 2.875844 | 0.447 | 0.028 | 5.67E-59 | UGDHAS1_NK |
| GNE | 4.27E-62 | 2.881492 | 0.485 | 0.046 | 1.10E-57 | UGDHAS1_NK |
| TMEM212 | 9.57E-62 | 4.42713 | 0.417 | 0.021 | 2.46E-57 | UGDHAS1_NK |
| OPHN1 | 2.24E-55 | 4.779591 | 0.396 | 0.025 | 5.75E-51 | UGDHAS1_NK |
| SPC25 | 9.89E-54 | 3.484113 | 0.374 | 0.02 | 2.54E-49 | UGDHAS1_NK |
| MTRNR2L2 | 1.87E-50 | 6.024669 | 0.391 | 0.031 | 4.79E-46 | UGDHAS1_NK |
| TATDN3 | 9.59E-50 | 2.871039 | 0.383 | 0.031 | 2.46E-45 | UGDHAS1_NK |
| LAIR1 | 8.01E-49 | 2.940636 | 0.523 | 0.095 | 2.06E-44 | UGDHAS1_NK |
| IDO1 | 2.66E-48 | 2.98188 | 0.319 | 0.013 | 6.82E-44 | UGDHAS1_NK |
| MTRNR2L8 | 5.69E-47 | 5.596344 | 0.37 | 0.031 | 1.46E-42 | UGDHAS1_NK |
| XKR9 | 3.56E-46 | 3.134394 | 0.328 | 0.019 | 9.14E-42 | UGDHAS1_NK |
| ARHGEF26-AS1 | 7.23E-46 | 3.434166 | 0.306 | 0.013 | 1.85E-41 | UGDHAS1_NK |
| MAB21L3 | 2.61E-45 | 3.166654 | 0.294 | 0.011 | 6.69E-41 | UGDHAS1_NK |
| HERC2P4 | 9.61E-45 | 3.421164 | 0.311 | 0.016 | 2.46E-40 | UGDHAS1_NK |
| LPP | 2.04E-39 | 3.041393 | 0.566 | 0.158 | 5.24E-35 | UGDHAS1_NK |
| ODF2L | 6.40E-26 | 4.227203 | 0.519 | 0.197 | 1.64E-21 | UGDHAS1_NK |
| UQCRFS1 | 2.23E-13 | 2.904456 | 0.077 | 0.331 | 5.73E-09 | UGDHAS1_NK |
| CFLAR | 4.48E-13 | 2.981286 | 0.566 | 0.336 | 1.15E-08 | UGDHAS1_NK |
| GOSR1 | 6.46E-12 | 4.1054 | 0.285 | 0.107 | 1.66E-07 | UGDHAS1_NK |
| PPP1CB | 0.008172756 | 3.674897 | 0.374 | 0.27 | 1 | UGDHAS1_NK |
| TFF3 | 6.94E-50 | 2.199052 | 0.577 | 0.064 | 1.78E-45 | IL7R_NK |
| SCGB2A2 | 1.82E-49 | 2.446611 | 0.639 | 0.086 | 4.67E-45 | IL7R_NK |
| SPINK2 | 7.00E-45 | 2.149946 | 0.433 | 0.037 | 1.80E-40 | IL7R_NK |
| IL7R | 5.62E-38 | 2.1672 | 0.763 | 0.194 | 1.44E-33 | IL7R_NK |
| PPP1R1B | 1.95E-33 | 1.553739 | 0.32 | 0.026 | 5.01E-29 | IL7R_NK |
| NINJ1 | 4.80E-30 | 1.966997 | 0.763 | 0.278 | 1.23E-25 | IL7R_NK |
| SCGB1D2 | 2.19E-28 | 1.482381 | 0.351 | 0.042 | 5.62E-24 | IL7R_NK |
| AAMDC | 3.99E-26 | 1.363429 | 0.299 | 0.033 | 1.02E-21 | IL7R_NK |
| XCL1 | 2.59E-25 | 1.776212 | 0.856 | 0.349 | 6.64E-21 | IL7R_NK |
| S100A9 | 3.08E-25 | 1.24364 | 0.361 | 0.053 | 7.91E-21 | IL7R_NK |
| RAMP1 | 1.25E-24 | 1.404923 | 0.258 | 0.025 | 3.21E-20 | IL7R_NK |
| KLRB1 | 3.01E-24 | 1.804343 | 0.835 | 0.418 | 7.72E-20 | IL7R_NK |
| IFI44L | 3.26E-24 | 1.578261 | 0.381 | 0.068 | 8.36E-20 | IL7R_NK |
| FXYD5 | 8.10E-24 | 1.630143 | 0.918 | 0.555 | 2.08E-19 | IL7R_NK |
| CALML5 | 2.30E-23 | 1.477007 | 0.351 | 0.054 | 5.90E-19 | IL7R_NK |
| FXYD7 | 3.29E-22 | 1.807842 | 0.361 | 0.066 | 8.44E-18 | IL7R_NK |
| PNMT | 6.25E-22 | 1.667777 | 0.309 | 0.045 | 1.60E-17 | IL7R_NK |
| IFI6 | 2.88E-21 | 1.456423 | 0.629 | 0.227 | 7.39E-17 | IL7R_NK |
| LTB | 2.89E-20 | 2.111326 | 0.515 | 0.158 | 7.42E-16 | IL7R_NK |
| TNFRSF4 | 3.84E-20 | 1.470058 | 0.423 | 0.099 | 9.86E-16 | IL7R_NK |
| IFITM3 | 8.16E-20 | 1.676473 | 0.732 | 0.338 | 2.09E-15 | IL7R_NK |
| IFI27 | 1.95E-19 | 1.51801 | 0.371 | 0.078 | 5.01E-15 | IL7R_NK |
| PIM3 | 4.68E-19 | 1.421354 | 0.711 | 0.314 | 1.20E-14 | IL7R_NK |
| KRT19 | 9.54E-19 | 1.639108 | 0.361 | 0.076 | 2.45E-14 | IL7R_NK |
| ISG15 | 3.14E-18 | 1.723754 | 0.67 | 0.295 | 8.06E-14 | IL7R_NK |
| CD83 | 4.17E-18 | 1.807977 | 0.649 | 0.268 | 1.07E-13 | IL7R_NK |
| CIRBP | 7.74E-18 | 1.190198 | 0.845 | 0.488 | 1.99E-13 | IL7R_NK |
| REL | 2.07E-17 | 1.173 | 0.897 | 0.637 | 5.31E-13 | IL7R_NK |
| NFKBID | 6.43E-17 | 1.309947 | 0.557 | 0.198 | 1.65E-12 | IL7R_NK |
| MAP3K8 | 1.41E-16 | 1.197616 | 0.722 | 0.328 | 3.63E-12 | IL7R_NK |
| PRPF6 | 3.76E-16 | 1.490493 | 0.412 | 0.124 | 9.66E-12 | IL7R_NK |
| TCF7 | 7.07E-16 | 1.371394 | 0.381 | 0.103 | 1.82E-11 | IL7R_NK |
| BCL2A1 | 7.49E-16 | 1.371626 | 0.443 | 0.134 | 1.92E-11 | IL7R_NK |
| GNA15 | 3.92E-14 | 1.223484 | 0.299 | 0.069 | 1.01E-09 | IL7R_NK |
| STARD10 | 1.03E-13 | 1.30205 | 0.289 | 0.067 | 2.63E-09 | IL7R_NK |
| GPR183 | 1.58E-13 | 1.192438 | 0.443 | 0.149 | 4.07E-09 | IL7R_NK |
| XCL2 | 3.54E-13 | 1.365449 | 0.649 | 0.339 | 9.09E-09 | IL7R_NK |
| TNFRSF18 | 4.01E-13 | 1.273719 | 0.619 | 0.281 | 1.03E-08 | IL7R_NK |
| TNFSF10 | 1.40E-12 | 1.171835 | 0.371 | 0.121 | 3.60E-08 | IL7R_NK |
| MIEN1 | 1.76E-12 | 1.280076 | 0.464 | 0.177 | 4.52E-08 | IL7R_NK |
| SMAP2 | 2.13E-12 | 1.171829 | 0.443 | 0.162 | 5.47E-08 | IL7R_NK |
| PLSCR1 | 3.29E-12 | 1.288362 | 0.371 | 0.121 | 8.43E-08 | IL7R_NK |
| FES | 3.56E-12 | 1.207134 | 0.299 | 0.082 | 9.12E-08 | IL7R_NK |
| CCR7 | 6.95E-12 | 1.49682 | 0.258 | 0.063 | 1.78E-07 | IL7R_NK |
| MX1 | 1.25E-11 | 1.199036 | 0.381 | 0.13 | 3.20E-07 | IL7R_NK |
| ID2 | 2.22E-11 | 1.129254 | 0.732 | 0.429 | 5.69E-07 | IL7R_NK |
| SLC16A3 | 1.40E-09 | 1.182441 | 0.526 | 0.272 | 3.60E-05 | IL7R_NK |
| RGS16 | 1.35E-06 | 1.211388 | 0.32 | 0.145 | 0.0345438 | IL7R_NK |
| HLA-DQA1 | 9.62E-06 | 1.196047 | 0.351 | 0.185 | 0.2468254 | IL7R_NK |
| CRTAM | 1.46E-05 | 1.282857 | 0.371 | 0.193 | 0.3740749 | IL7R_NK |
