# Supplementary material for: TNBC-Specific UGDH-AS1+ NK Cells Encode NSKM, Promoting Cancer Progression by Inhibiting NK Cells Activity
Source: Research Square preprint supplement (doi:10.21203/rs.3.rs-4723989/v1), 2024-07-21
Supplement: Supplementary file 3 [file 5440e0e0743cb33b23949484.docx]

Table S1 Used primers in this study

|  | Forward primers sequence | Reverse primers sequence |
| --- | --- | --- |
| qPCR primers | | |
| UGDH-AS1 | TACTCACCAGCATCAACTATCAGA | CTTCGCCGTCTTCTCCTGTT |
| IFNG | TCGGTAACTGACTTGAATGTCCA | TCGCTTCCCTGTTTTAGCTGC |
| GZMB | CCACTCTCGACCCTACATGG | GGCCCCCAAAGTGACATTTATT |
| PRF1 | AGCACAAGTTCGTGCCAGG | GCGTCTCTCATTAGGGAGTTTTT |
| T-bet | AGCAAGGACGGCGAATGTT | GGGTGGACATATAAGCGGTTC |
| GAPDH | CGAAGGCTCAGAATCCAGAAC | GGTCATCAGGCTCACTCTCA |
| U6 | AAGCAGAATGTCATCCGAGGTA | ATGGCAGGTGTCCGAAGTG |
| HPRT1 | CTTTGCTGACCTGCTGGATT | TCCCCTGTTGACTGGTCATT |
| circHIPK3 | TCGGCCAGTCATGTATCAAA | ACCAAGACTTGTGAGGCCAT |
| β-actin | CATGTACGTTGCTATCCAGGC | CTCCTTAATGTCACGCACGAT |
| ChIP primers | | |
| UGDH-AS1 |  |  |
| A | GAGAGTCACAACAAACCAAACC | ATCCAACTATAATGCCCATCGT |
| B | GCACATCTCAGAGCAGACAGT | CGACAGACCTCAAAGACACAGT |
| C | AGAGAACCGCTTCCTGTGG | GTCGTCTGGGCTTCTTATTCAA |
| D | ATCGTTCGGACAGCACCTT | CTGAGCCGTGAAGGAAATAGG |
| E | TACTCCTCGCCCACAACCT | CACAGCACGCACAGACATC |
| TBX21 |  |  |
| A | CATTCAACAGTCTCACATCTC | GGATACATGACAGTACCAGAA |
| B | CCTGCCAACTTGCCTCTTG | AACATTTCAGTGAACACCCTCT |
| C | AGCCTCCATCGTCCTATCTC | CGTGCCTCATCCATAGACTG |
| D | CGAAAGGTCACTTAGCACAGAG | GGCATTCTCCTGGCACTCA |
| E | TGCCTAGTATTAGCCACGAGAG | TCAGCATGTCTCCGCAACC |
|  |  |  |
