# Supplementary material for: TNBC-Specific UGDH-AS1+ NK Cells Encode NSKM, Promoting Cancer Progression by Inhibiting NK Cells Activity
Source: Research Square preprint supplement (doi:10.21203/rs.3.rs-4723989/v1), 2024-07-21
Supplement: Supplementary file 4 [file 5ac3765203fda5eca27218ec.docx]

Table S2 Sequences of siRNAs and shRNAs used in this study

| No. | Sequence (5'-3') |
| --- | --- |
| sh*UGDH-AS1*-#1 | SS: 5’-GGGCGGTGCTGGATCCAAA-3'; |
| AS: 5’-TTTGGATCCAGCACCGCCC-3' |
| sh*UGDH-AS1*-#2 | SS: 5’-GGGTGGTGCTAGGTCTAAA-3’; |
| AS: 5’-TTTAGACCTAGCACCACCC-3' |
| siSMAD4-#1 | 5’-GGACAGAAUAUAUGUGUUAAU-3‘ |
| siSMAD4-#2 | 5’-AGAGUACUCUGUACAAUAAAU-3’ |
| sic-Myc-#1 | 5’-GUCUAUGUGUACAGAUGAAUG-3’ |
| siT-bet-#1 | 5’-CCAGGAAGUUUCAUUUGGGAA-3’ |
