# Supplementary material for: TNBC-Specific UGDH-AS1+ NK Cells Encode NSKM, Promoting Cancer Progression by Inhibiting NK Cells Activity
Source: Research Square preprint supplement (doi:10.21203/rs.3.rs-4723989/v1), 2024-07-21
Supplement: Supplementary file 5 [file e2bf7b4a7439f54bee19b1a6.docx]

Table S4 Top 10 marker genes of the non-TNBC(HR+, HER2+) scRNA-seq data

| gene | p_val | avg_log2FC | pct.1 | pct.2 | p_val_adj | cluster |
| --- | --- | --- | --- | --- | --- | --- |
| STMN1 | 0 | 3.470159 | 0.906 | 0.226 | 0 | cycling_cells |
| HMGB2 | 0 | 3.223557 | 0.89 | 0.257 | 0 | cycling_cells |
| UBE2C | 0 | 2.975579 | 0.664 | 0.024 | 0 | cycling_cells |
| TYMS | 0 | 2.896601 | 0.644 | 0.022 | 0 | cycling_cells |
| MKI67 | 0 | 2.478002 | 0.655 | 0.017 | 0 | cycling_cells |
| PTTG1 | 0 | 2.408567 | 0.696 | 0.102 | 0 | cycling_cells |
| HMGN2 | 7.03E-206 | 2.707975 | 0.949 | 0.578 | 1.69E-201 | cycling_cells |
| TUBB | 6.04E-185 | 2.718642 | 0.879 | 0.436 | 1.45E-180 | cycling_cells |
| TUBA1B | 4.06E-174 | 2.53128 | 0.935 | 0.548 | 9.77E-170 | cycling_cells |
| HIST1H4C | 5.13E-160 | 3.009507 | 0.794 | 0.343 | 1.23E-155 | cycling_cells |
| FABP4 | 0 | 4.371219 | 0.493 | 0.011 | 0 | Edothelials |
| ACKR1 | 0 | 4.078254 | 0.511 | 0.002 | 0 | Edothelials |
| PLVAP | 0 | 4.040529 | 0.8 | 0.005 | 0 | Edothelials |
| RAMP2 | 0 | 3.910023 | 0.875 | 0.075 | 0 | Edothelials |
| AQP1 | 0 | 3.748998 | 0.795 | 0.007 | 0 | Edothelials |
| A2M | 0 | 3.738456 | 0.916 | 0.073 | 0 | Edothelials |
| VWF | 0 | 3.719823 | 0.746 | 0.002 | 0 | Edothelials |
| SPARCL1 | 0 | 3.676713 | 0.916 | 0.082 | 0 | Edothelials |
| HSPG2 | 0 | 3.626644 | 0.797 | 0.034 | 0 | Edothelials |
| IGFBP7 | 0 | 3.531914 | 0.949 | 0.095 | 0 | Edothelials |
| COL1A1 | 0 | 5.239499 | 0.677 | 0.041 | 0 | Fibroblasts |
| DCN | 0 | 4.941323 | 0.665 | 0.02 | 0 | Fibroblasts |
| COL1A2 | 0 | 4.797234 | 0.772 | 0.029 | 0 | Fibroblasts |
| COL3A1 | 0 | 4.656497 | 0.711 | 0.026 | 0 | Fibroblasts |
| LUM | 0 | 4.40469 | 0.59 | 0.016 | 0 | Fibroblasts |
| CFD | 0 | 4.1338 | 0.332 | 0.083 | 0 | Fibroblasts |
| BGN | 0 | 4.080576 | 0.765 | 0.028 | 0 | Fibroblasts |
| SFRP2 | 0 | 4.048874 | 0.456 | 0.007 | 0 | Fibroblasts |
| COL6A2 | 0 | 3.892714 | 0.807 | 0.04 | 0 | Fibroblasts |
| RGS5 | 0 | 3.858476 | 0.293 | 0.017 | 0 | Fibroblasts |
| LYZ | 0 | 5.239013 | 0.694 | 0.008 | 0 | Myeloids |
| APOE | 0 | 5.134915 | 0.605 | 0.087 | 0 | Myeloids |
| APOC1 | 0 | 5.092398 | 0.609 | 0.038 | 0 | Myeloids |
| C1QC | 0 | 4.526769 | 0.564 | 0.007 | 0 | Myeloids |
| C1QB | 0 | 4.417503 | 0.552 | 0.007 | 0 | Myeloids |
| TYROBP | 0 | 4.272191 | 0.881 | 0.037 | 0 | Myeloids |
| C1QA | 0 | 4.220531 | 0.548 | 0.009 | 0 | Myeloids |
| FTL | 0 | 3.981655 | 0.986 | 0.812 | 0 | Myeloids |
| FCER1G | 0 | 3.966553 | 0.821 | 0.017 | 0 | Myeloids |
| CCL3L1 | 0 | 3.95121 | 0.401 | 0.029 | 0 | Myeloids |
| KRT14 | 0 | 4.782172 | 0.862 | 0.022 | 0 | myethelials |
| KRT17 | 0 | 4.778984 | 0.862 | 0.036 | 0 | myethelials |
| MYLK | 0 | 3.596795 | 0.77 | 0.048 | 0 | myethelials |
| TAGLN | 0 | 3.591967 | 0.885 | 0.069 | 0 | myethelials |
| ACTA2 | 0 | 3.550356 | 0.872 | 0.077 | 0 | myethelials |
| CYR61 | 0 | 3.528398 | 0.835 | 0.18 | 0 | myethelials |
| SAA1 | 0 | 3.494969 | 0.79 | 0.054 | 0 | myethelials |
| MMP7 | 0 | 3.317815 | 0.356 | 0.026 | 0 | myethelials |
| DST | 0 | 3.304984 | 0.814 | 0.148 | 0 | myethelials |
| C2orf40 | 0 | 3.225246 | 0.723 | 0.017 | 0 | myethelials |
| SCGB2A2 | 0 | 5.470535 | 0.569 | 0.073 | 0 | Epithelials |
| SCGB1D2 | 0 | 5.342459 | 0.515 | 0.039 | 0 | Epithelials |
| TFF1 | 0 | 4.389109 | 0.525 | 0.025 | 0 | Epithelials |
| AZGP1 | 0 | 4.352041 | 0.786 | 0.046 | 0 | Epithelials |
| KRT19 | 0 | 4.247897 | 0.84 | 0.073 | 0 | Epithelials |
| CLDN4 | 0 | 4.136854 | 0.759 | 0.035 | 0 | Epithelials |
| ELF3 | 0 | 4.124055 | 0.713 | 0.025 | 0 | Epithelials |
| MGP | 0 | 4.037844 | 0.867 | 0.168 | 0 | Epithelials |
| TFF3 | 0 | 4.022191 | 0.619 | 0.064 | 0 | Epithelials |
| PIP | 0 | 3.944703 | 0.372 | 0.029 | 0 | Epithelials |
| GNLY | 0 | 4.712999 | 0.888 | 0.057 | 0 | NK |
| GZMB | 0 | 3.166734 | 0.698 | 0.072 | 0 | NK |
| NKG7 | 0 | 2.921355 | 0.896 | 0.216 | 0 | NK |
| CTSW | 0 | 2.89117 | 0.837 | 0.145 | 0 | NK |
| KLRD1 | 0 | 2.842106 | 0.728 | 0.056 | 0 | NK |
| XCL1 | 0 | 2.824692 | 0.506 | 0.052 | 0 | NK |
| PRF1 | 0 | 2.817821 | 0.64 | 0.085 | 0 | NK |
| TYROBP | 0 | 2.698121 | 0.862 | 0.062 | 0 | NK |
| XCL2 | 0 | 2.683773 | 0.471 | 0.051 | 0 | NK |
| FGFBP2 | 0 | 2.492633 | 0.319 | 0.012 | 0 | NK |
| IGHV4-59 | 0 | 8.217689 | 0.311 | 0.008 | 0 | Plasma_Bcells |
| IGKV1-39 | 0 | 6.911775 | 0.313 | 0.018 | 0 | Plasma_Bcells |
| JCHAIN | 0 | 6.207023 | 0.742 | 0.023 | 0 | Plasma_Bcells |
| IGHG1 | 0 | 6.021628 | 0.8 | 0.055 | 0 | Plasma_Bcells |
| IGKV1-5 | 0 | 6.018358 | 0.274 | 0.015 | 0 | Plasma_Bcells |
| IGKC | 0 | 5.881013 | 0.76 | 0.061 | 0 | Plasma_Bcells |
| IGHA1 | 0 | 4.723071 | 0.262 | 0.026 | 0 | Plasma_Bcells |
| IGLC2 | 0 | 4.54954 | 0.317 | 0.022 | 0 | Plasma_Bcells |
| IGKV1D-33 | 0 | 4.495101 | 0.263 | 0.003 | 0 | Plasma_Bcells |
| IGHG2 | 0 | 4.347474 | 0.258 | 0.026 | 0 | Plasma_Bcells |
| MS4A1 | 0 | 4.270477 | 0.867 | 0.017 | 0 | Naive_Bcells |
| CD79A | 0 | 3.934361 | 0.866 | 0.05 | 0 | Naive_Bcells |
| HLA-DRA | 0 | 3.490167 | 0.981 | 0.223 | 0 | Naive_Bcells |
| HLA-DQA1 | 0 | 3.203199 | 0.937 | 0.184 | 0 | Naive_Bcells |
| CD83 | 0 | 3.11241 | 0.781 | 0.147 | 0 | Naive_Bcells |
| CD74 | 0 | 3.093568 | 0.998 | 0.598 | 0 | Naive_Bcells |
| BANK1 | 0 | 2.968177 | 0.642 | 0.003 | 0 | Naive_Bcells |
| HLA-DQB1 | 0 | 2.937689 | 0.918 | 0.216 | 0 | Naive_Bcells |
| CD37 | 0 | 2.843219 | 0.931 | 0.326 | 0 | Naive_Bcells |
| HLA-DRB1 | 0 | 2.729923 | 0.96 | 0.348 | 0 | Naive_Bcells |
| CCL5 | 0 | 3.328313 | 0.713 | 0.095 | 0 | Tcells |
| CD3E | 0 | 3.095622 | 0.864 | 0.065 | 0 | Tcells |
| IL7R | 0 | 3.082867 | 0.637 | 0.058 | 0 | Tcells |
| GZMK | 0 | 3.081561 | 0.483 | 0.035 | 0 | Tcells |
| IL32 | 0 | 2.844041 | 0.885 | 0.185 | 0 | Tcells |
| CXCR4 | 0 | 2.816818 | 0.861 | 0.188 | 0 | Tcells |
| CD3D | 0 | 2.75206 | 0.715 | 0.045 | 0 | Tcells |
| RGCC | 0 | 2.745137 | 0.791 | 0.231 | 0 | Tcells |
| DUSP2 | 0 | 2.692142 | 0.82 | 0.224 | 0 | Tcells |
| TNFAIP3 | 0 | 2.681054 | 0.835 | 0.247 | 0 | Tcells |
